# Supplementary material for: Ginger leaf polyphenols mitigate β-amyloid toxicity via JNK/FOXO pathway activation in Caenorhabditis elegans
Source: Royal Society of Chemistry journal article supplement (doi:10.1039/d4fo03238a), 2025-01-01
Supplement: d4fo03238a1.pdf [file d4fo03238a1.pdf]

**Polyphenol-enriched extracts from the ginger leaves against toxicity induced by  $\beta$ -amyloid in *Caenorhabditis elegans***

Tao Gao <sup>a, 1</sup>, Ningning Yan <sup>a, 1</sup>, Yaying Pu <sup>b</sup>, Zhonghao Zhang <sup>a</sup>, Zhihao Duan <sup>a</sup>,  
Zizhong Tang <sup>a</sup>, Daojian Huang <sup>c</sup>, Yanger Chen <sup>a</sup>, Shu Yuan <sup>d</sup>, Xiaorong Yan <sup>b</sup>, Ming  
Yuan <sup>a, \*</sup>

<sup>a</sup> *College of Life Science, Sichuan Agricultural University, Yaan 625014, PR China*

<sup>b</sup> *Yaan People's Hospital, Yaan, 625099, China*

<sup>c</sup> *College of Animal Science and Technology, Sichuan Agricultural University,  
Chengdu 611130, China*

<sup>d</sup> *College of Resources, Sichuan Agricultural University, Chengdu, 611130, China*

<sup>1</sup> *These authors contributed equally to this work.*

\*Corresponding author.

E-mail address: yuanming@sicau.edu.cn (M. Yuan).

**Fig. S1** Effect of single-factor on the polyphenol yield. (A) Ethanol concentration. (B) Power. (C) Liquid-solid ratio. (D) Time.

**Fig. S2** Response surface analysis of extraction parameters on polyphenol yield. (A) Time and ethanol concentration. (B) Power and ethanol concentration. (C) Liquid-solid ratio and ethanol concentration. (D) Power and time. (E) Liquid-solid ratio and time. (F) Liquid-solid ratio and power.

**Fig. S3** The gradient elution curve of crude polyphenols from ginger leaves by silica gel column.

**Fig. S4** The antioxidant activities of GLP *in vitro*. (A) The scavenging ability to DPPH radical. (B) The scavenging ability to hydroxyl radical. (C) The scavenging ability to ABTS radical. (D) Anti-lipid peroxidation capacity. The value is the average  $\pm$  SE.

**Fig. S5** The effect of GLP on the reproductive toxicity (A) and survival curve (B) in N2 worms. Statistical analysis of survival curve (C). 50  $\mu$ m of resveratrol as positive control (Res group).

**Fig. S1**

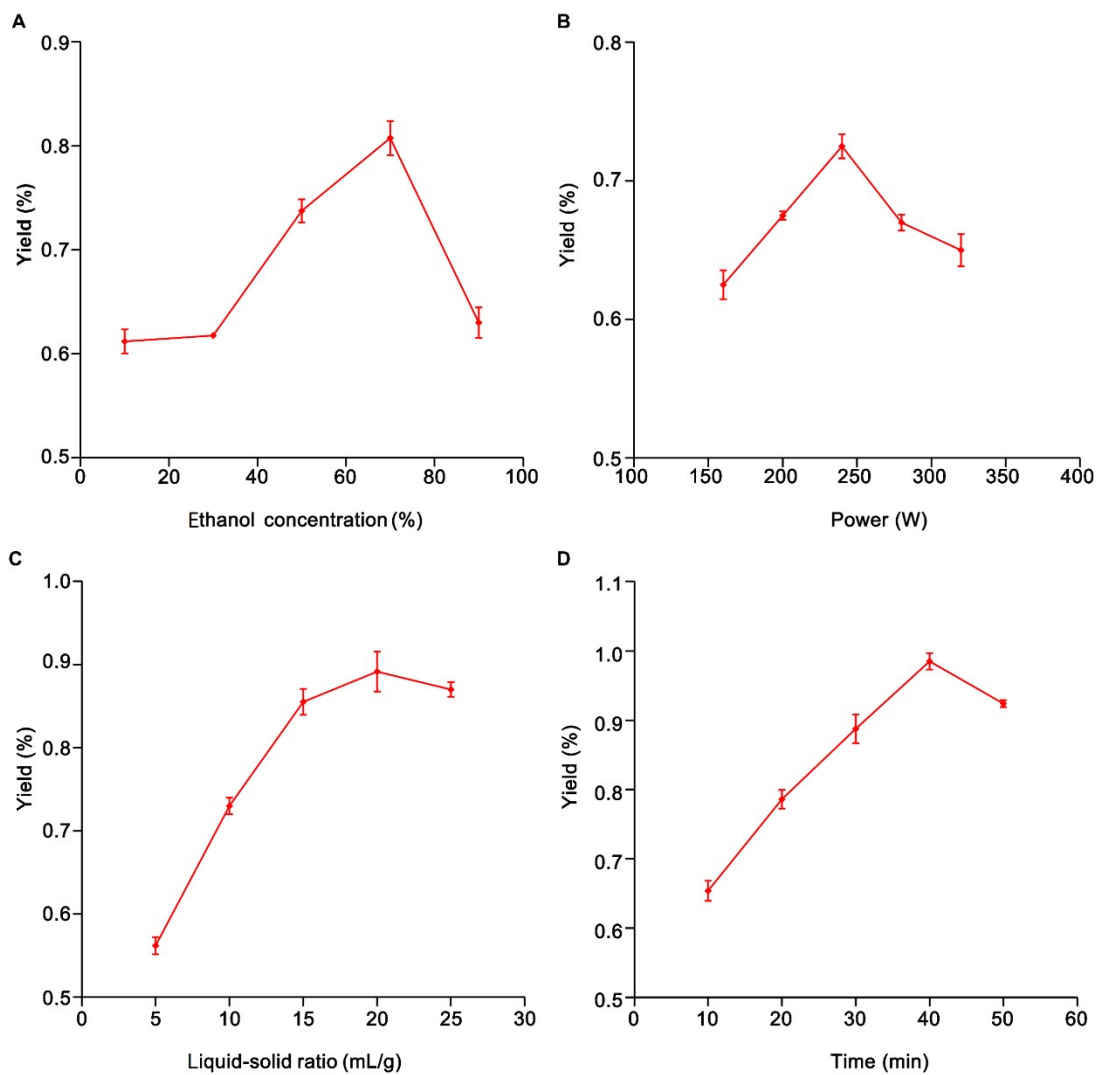

Fig. S2

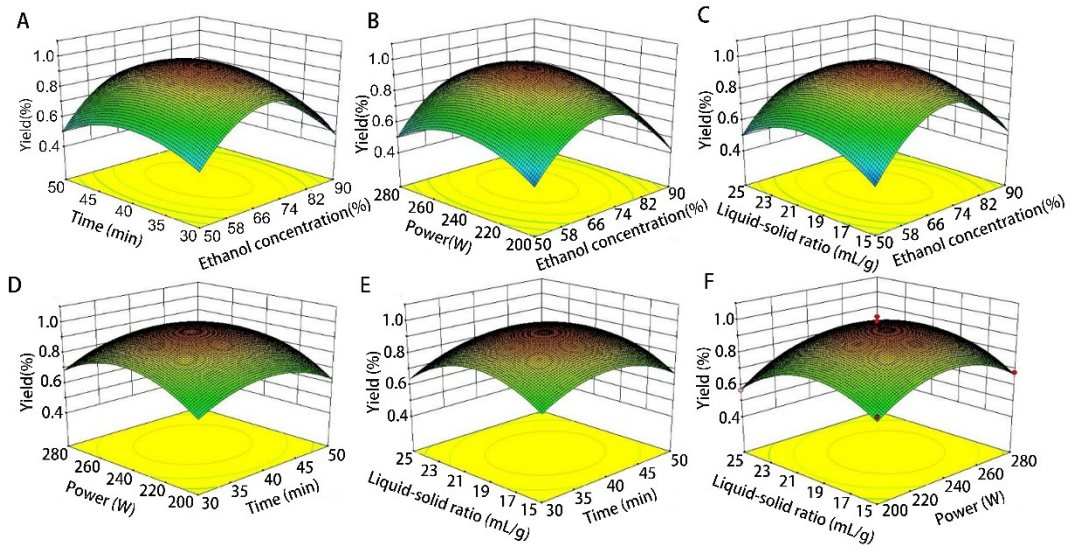

**Fig. S3**

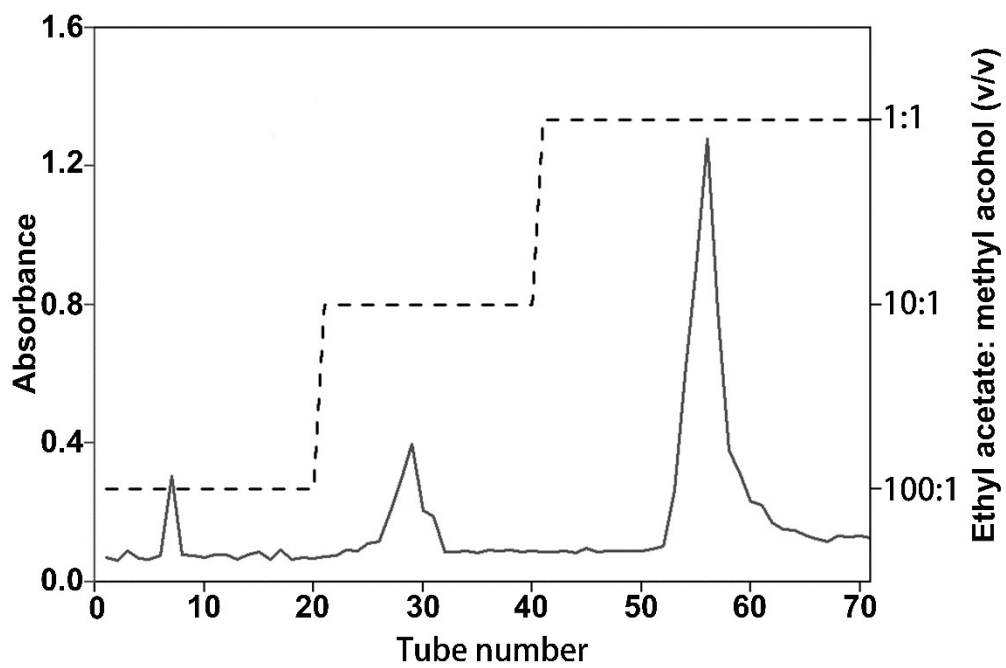

**Fig. S4**

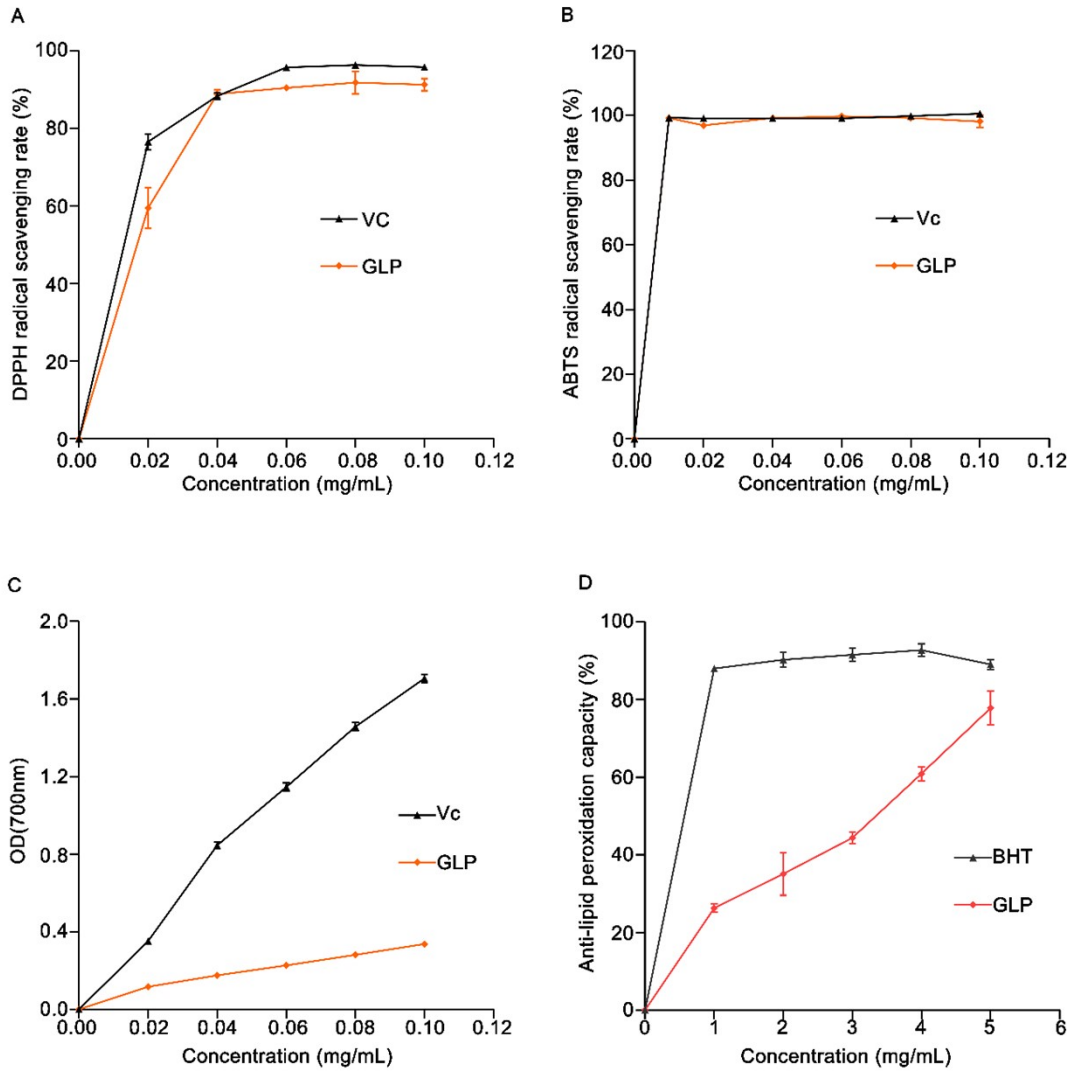

**Fig. S5**

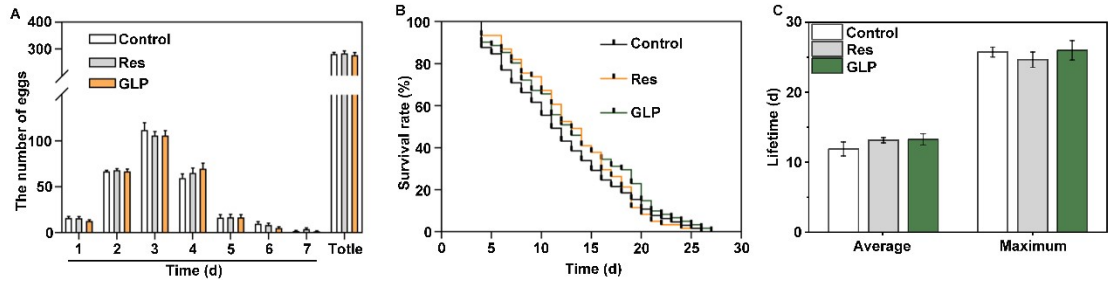

**Table S1** The sequences of qPCR primers.

**Table S2** ANOVA for the quadratic response surface model.



**Table S1** The sequences of qPCR primers.

| Name            | Forward                    | Reverse                    |
|-----------------|----------------------------|----------------------------|
| <i>Actin</i>    | CCAGGAATTGCTGATCGTATGCAGAA | TGGAGAGGGAAGCGAGGATAGA     |
| <i>jnk-1</i>    | GCCATTCTGGTAGAGGAAGTTTCTC  | CGCCAGTCCAAAATCAAGAATC     |
| <i>daf-16</i>   | CCACCACCATCATACCACGAGTTG   | CATTGGCTTGAAGTTAGTGTCTGGC  |
| <i>sod-3</i>    | AGCCGACTTGCATGTGGA ACTATC  | ATTGTGTA ACTGGAGGAAGGGATGC |
| <i>hsp-16.2</i> | TGTAGATGTTGGTGCAGTTGCTTCG  | CTTCGACGATTGCCTGTTGAATTGG  |

**Table S2** ANOVA for the quadratic response surface model.

| Source                        | Sum of squares | Df | Mean square | F-value  | p-value   |
|-------------------------------|----------------|----|-------------|----------|-----------|
| Model                         | 0.8274         | 14 | 0.0591      | 34.8593  | <0.0001** |
| A                             | 0.0001         | 1  | 0.0001      | 0.0786   | 0.7832    |
| B                             | 0.0003         | 1  | 0.0003      | 0.1769   | 0.6804    |
| C                             | 0.0120         | 1  | 0.0120      | 7.0973   | 0.0185*   |
| D                             | 0.0027         | 1  | 0.0027      | 1.5925   | 0.2276    |
| AB                            | 0.0006         | 1  | 0.0006      | 0.3686   | 0.5535    |
| AC                            | 0.0012         | 1  | 0.0012      | 0.7225   | 0.4096    |
| AD                            | 0.0049         | 1  | 0.0049      | 2.8900   | 0.1112    |
| BC                            | 0.0002         | 1  | 0.0002      | 0.1327   | 0.7211    |
| BD                            | 0.0004         | 1  | 0.0004      | 0.2359   | 0.6347    |
| CD                            | 0.0016         | 1  | 0.0016      | 0.9437   | 0.3478    |
| A <sup>2</sup>                | 0.6680         | 1  | 0.6680      | 394.0056 | <0.0001** |
| B <sup>2</sup>                | 0.1198         | 1  | 0.1198      | 70.6746  | <0.0001** |
| C <sup>2</sup>                | 0.1680         | 1  | 0.1680      | 99.0649  | <0.0001** |
| D <sup>2</sup>                | 0.1732         | 1  | 0.1732      | 102.1670 |           |
| Residual                      | 0.0237         | 14 | 0.0017      |          | <0.0001** |
| Lack of Fit                   | 0.0176         | 10 | 0.0018      | 1.1514   | 0.4845    |
| Pure Error                    | 0.0061         | 4  | 0.0015      |          |           |
| Cor Total                     | 0.8512         | 28 |             |          |           |
| R <sup>2</sup>                | 0.9721         |    |             |          |           |
| R <sup>2</sup> <sub>adj</sub> | 0.9442         |    |             |          |           |

Abbreviations: A, ethanol concentration. B, power. C, liquid-solid ratio. D, time.

\* Means significant,  $p < 0.05$ ; \*\* Means extremely significant differences,  $p < 0.01$ .
